# Supplementary material for: Construction of a hierarchically structured, NiCo–Cu-based trifunctional electrocatalyst for efficient overall water splitting and 5-hydroxymethylfurfural oxidation
Source: Royal Society of Chemistry journal article supplement (doi:10.1039/d1se00697e), 2021-01-01
Supplement: d1se00697e1.pdf [file d1se00697e1.pdf]

# Supporting Information

## Construction of a hierarchically structured, NiCo-Cu-based trifunctional electrocatalyst for efficient overall water splitting and 5- hydroxymethylfurfural oxidation

Ruijuan Zheng<sup>a</sup>, Chenhao Zhao<sup>a</sup>, Jinhua Xiong<sup>a</sup>, Xue Teng<sup>b</sup>, Wuhua Chen<sup>a</sup>, Zhibiao

Hu<sup>a</sup> and Zuofeng Chen<sup>b,\*</sup>

<sup>a</sup>Fujian Provincial Colleges and University Engineering Research Center of Solid Waste Resource Utilization (Longyan University); Fujian Provincial Key Laboratory of Clean Energy Materials, Longyan University, Longyan 364012, Fujian, China;

<sup>b</sup>Shanghai Key Laboratory of Chemical Assessment and Sustainability, School of Chemical Science and Engineering, Tongji University, Shanghai 200092, China.

### EXPERIMENTAL

**Chemicals.** Commercial copper foam (CF) with a thickness of 2 mm was performed from Kunshan Lvchuang Electronics Co. LTD. 5-Hydroxymethylfurfural (HMF, 99%), 2, 5-furandicarboxylic acid (FDCA, 98%), 2-formyl-5-furancarboxylic acid (FFCA, 98%), 2, 5-Diformylfuran (DFF, 98%) and 5-Hydroxymethyl-2-furancarboxylic acid (HMFCA, 98%) were purchased from Aladdin. Concentrated hydrochloric acid (HCl, 37%), sodium hydroxide (NaOH, 96%), potassium hydroxide

(KOH, 85%), ammonium persulfate ((NH<sub>4</sub>)<sub>2</sub>S<sub>2</sub>O<sub>8</sub>, 98%), cobalt chloride hexahydrate (CoCl<sub>2</sub>•6H<sub>2</sub>O, 99%) and nickel chloride hexahydrate (NiCl<sub>2</sub>•6H<sub>2</sub>O, 98%) were purchased from Sinopharm Group Co. LTD. All reagents were used directly without any further purification. Unless stated otherwise, deionized water was used in all experiments.

*Apparatus.* Scanning electron microscopy (SEM) images and energy dispersive X-ray (EDX) elemental analysis data were obtained at Hitachi S-4800. Powder X-ray diffraction (XRD) patterns were measured by X'Pert 3 Powder. X-ray photoelectron spectroscopy (XPS) analysis for elemental compositions and valence states was conducted on a Kratos Axis Ultra DLD X-ray Photoelectron Spectrometer. The elemental contents of Ni and Co were measured by the inductively coupled plasma atomic emission spectroscopy (ICP-AES) using the Perkin Elmer ICP-OES Optima 8300.

All electrochemical measurements were conducted on a CHI 660E electrochemical workstation (Chenhua Corp., Shanghai, China) with a typical three-electrode setup in an electrolyte solution of 1 M KOH, consisting of a NiCo<sub>NSs</sub>/Cu NWs as the working electrode, a graphite rod as a counter electrode and a saturated calomel electrode (SCE) as the reference electrode. The two-compartment cell was separated by an anion exchange membrane. Linear sweep voltammetry (LSV) measurements were conducted in 1 M KOH at a scan rate of 2 mV/s. Potentials reported were referenced to a reversible hydrogen electrode by  $E(\text{RHE}) = E(\text{SCE}) + 1.044 \text{ V}$ . The electrochemical impedance spectroscopy (EIS) measurements were

carried out in the range from  $10^5$  to 1 Hz with an amplitude of 5 mV at the open-circuit potential in 1 M KOH. The electrochemically active surface area (ECSA) was investigated by cyclic voltammetry (CV) to determine the electrochemical double-layer capacitances ( $C_{dl}$ ) in 1 M KOH. All electrochemical measurements were conducted without  $iR$  compensation. All experiments were performed at  $22 \pm 2$  °C.

**Synthesis of NiCo<sub>NSs</sub>/CuNWs.** The NiCo<sub>NSs</sub>/CuNWs was prepared by a facile three-step procedure. Firstly, a piece of Cu foam (1 cm × 2 cm) was immersed in 3 M HCl to remove surface oxide layer, and then cleaned with deionized water by ultrasonication for 10 min. To obtain Cu(OH)<sub>2</sub> nanowires (NWs) on Cu foam (CF), The cleaned Cu foam was immersed into aqueous solution containing 2 M NaOH and 0.1 M (NH<sub>4</sub>)<sub>2</sub>S<sub>2</sub>O<sub>8</sub> for 25 min silently. The color of Cu foam surface was changed from golden yellow to blue-green. The Cu foam was taken out from the solution, rinsed with deionized water and dried in air. The electrochemical reduction of Cu(OH)<sub>2</sub> NWs to Cu NWs was achieved by applying a constant cathodic current density of 20 mA cm<sup>-2</sup> in 1 M Na<sub>2</sub>SO<sub>4</sub> aqueous solution, and the color of the Cu(OH)<sub>2</sub> nanowires was changed from blue-green to dark wine. The resultant Cu NWs was cleaned with deionized water for several times, then dried at 60 °C in a vacuum drying oven.

The NiCo<sub>NSs</sub>/Cu<sub>NWs</sub> electrode was synthesized by a simple cyclic voltammetry method in an electrolyte containing 0.1 M CoCl<sub>2</sub> and 0.1 M NiCl<sub>2</sub>. The electrodeposition process was carried out in a three-electrode system using Cu NWs as the working electrode, a graphite rod as the counter electrode, and a saturated

calomel electrode (SCE) as the reference electrode within a potential range of  $-1.2$  to  $0.2$  V at a scan rate of  $10$  mV/s for 25 cycles. After electrodeposition, the electrodes were carefully rinsed thoroughly with deionized water and ethanol and dried at  $60$  °C in a vacuum drying oven.

Commercial 20% Pt/C (or RuO<sub>2</sub>) with a mass loading of  $3$  mg cm<sup>-2</sup> was dropped onto Cu NWs electrode, followed by drying in an electric oven at  $60$  °C.

**HPLC analysis.** HPLC (Shimadzu Prominence LC-2030C system) equipped with an ultraviolet-visible detector set at  $265$  nm and a  $4.6$  mm  $\times$   $150$  mm Shim-pack GWS  $5$   $\mu$ m C18 column was used to analyze HMF and its oxidation products. Specifically,  $10$   $\mu$ L of electrolyte was periodically collected during potentiostatic electrolysis and diluted with  $990$  mL water. The eluent solvent is a mixture aqueous solution of  $5$  mM ammonium formate and methanol, the ratio of ammonium formate and methanol was  $7:3$ . The flow rate is  $0.5$  ml min<sup>-1</sup>, and each separation lasts for  $10$  minutes.

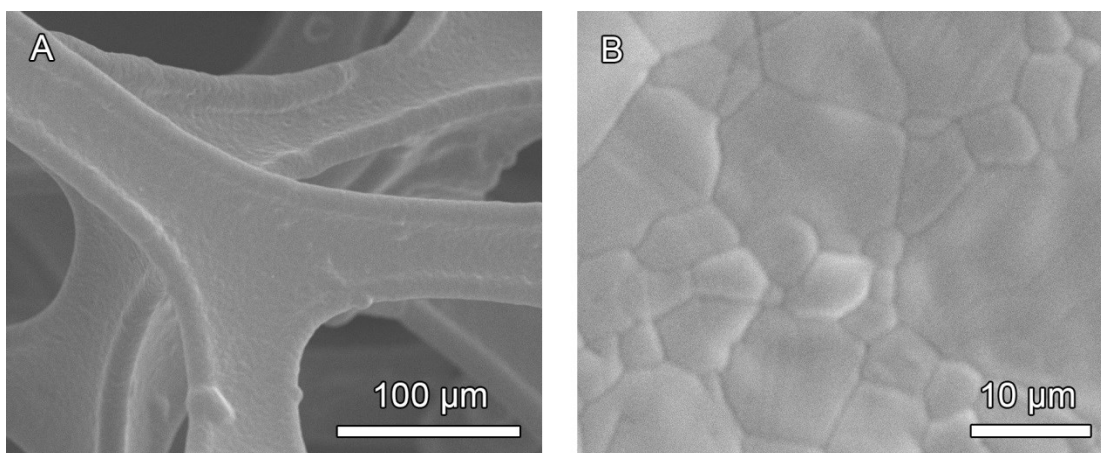

**Figure S1.** SEM images of Cu foam substrate of different magnifications.

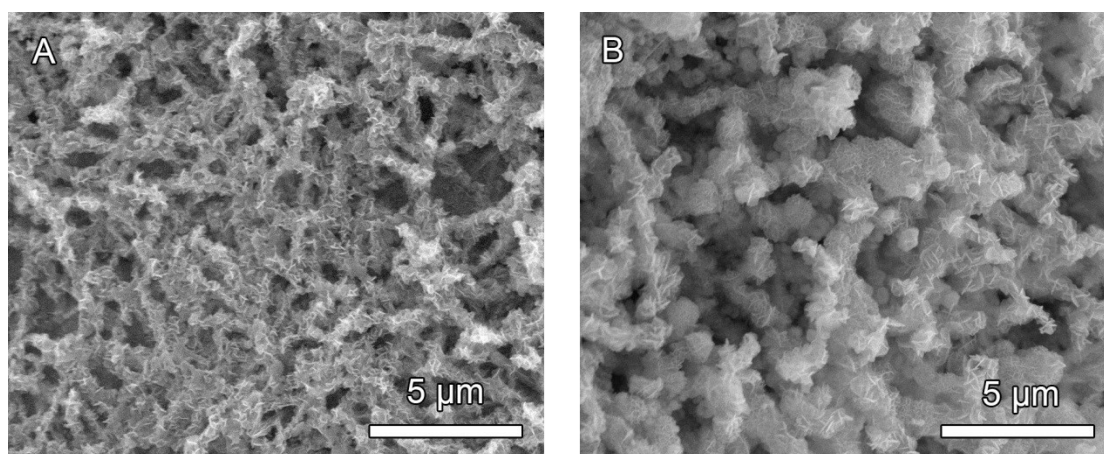

**Figure S2.** SEM images of NiNSs/CuNWs (A) and CoNSs/CuNWs (B)

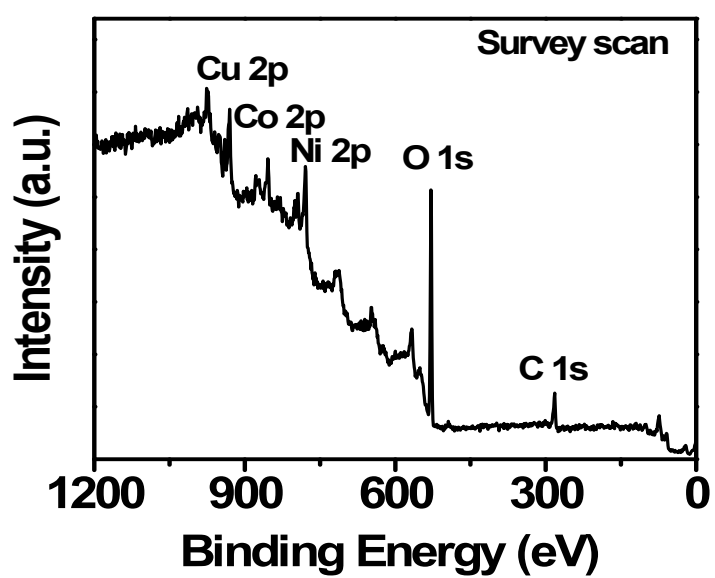

**Figure S3.** Survey XPS spectrum of NiCoNSs/CuNWs.

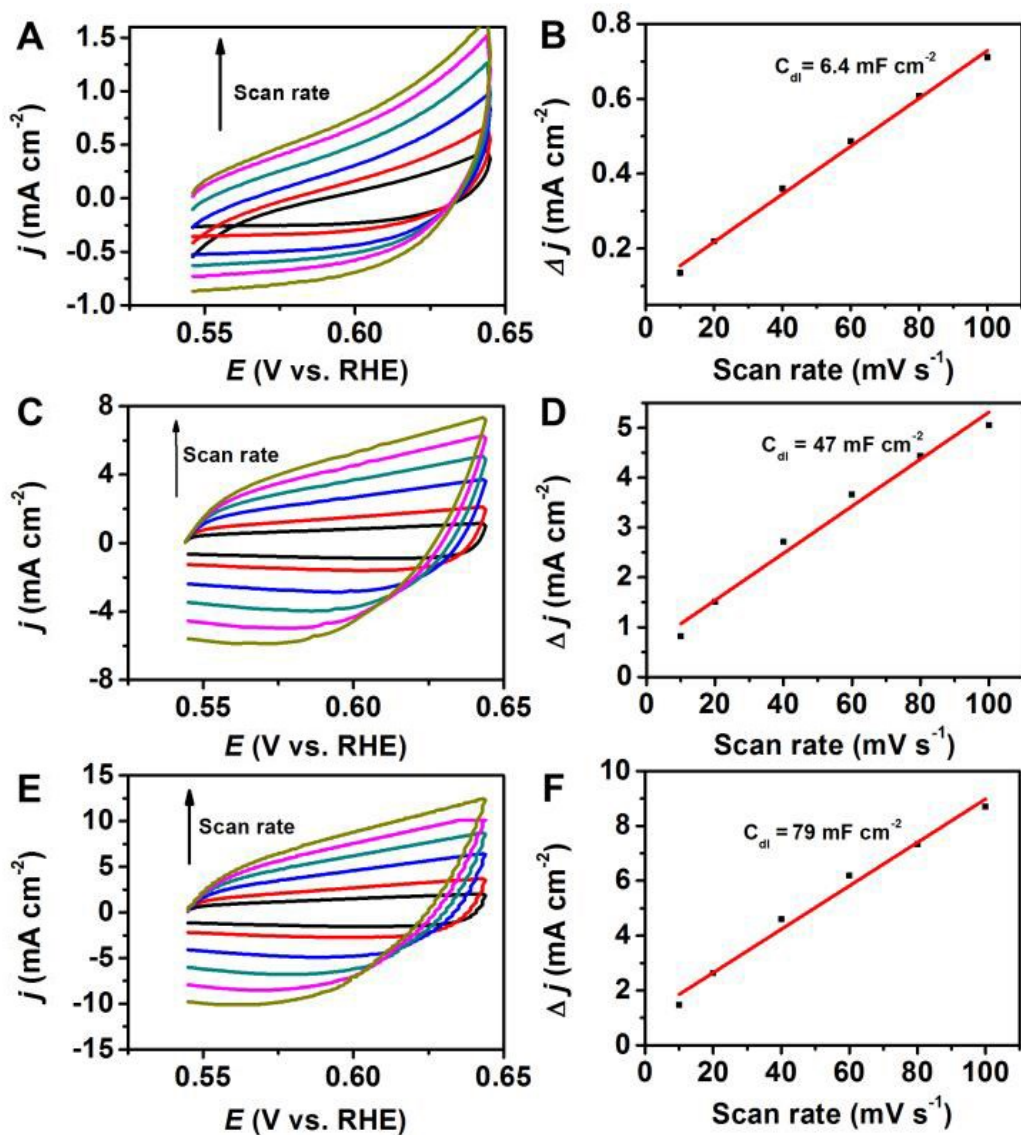

**Figure S4.** Cyclic voltammograms at scanning rates of 10, 20, 40, 60, 80 and 100 mV/s in the potential range of 0.545 ~ 0.645 vs. RHE and capacitive current at 0.595 V as a function of the scan rate for different electrodes in 1 M KOH. (A, B) Cu foam; (C, D) Cu(OH)<sub>2</sub> NWs; (E, F) Cu NWs.

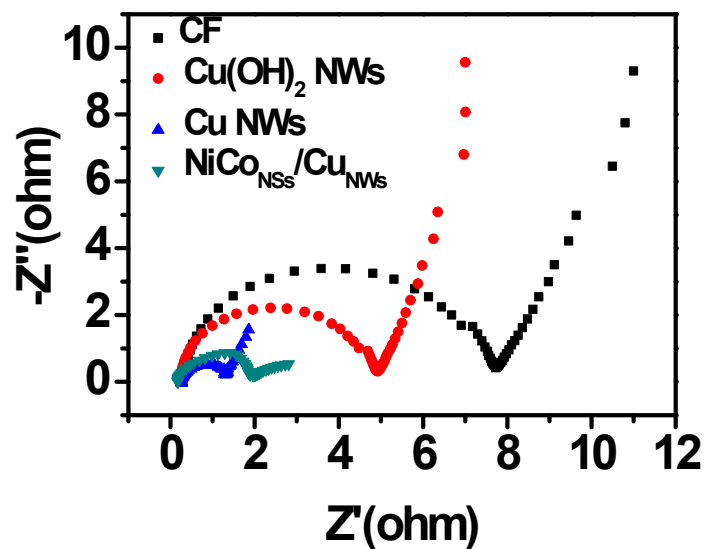

**Figure S5.** EIS spectra of different material samples at open circuit potentials in 1 M KOH.

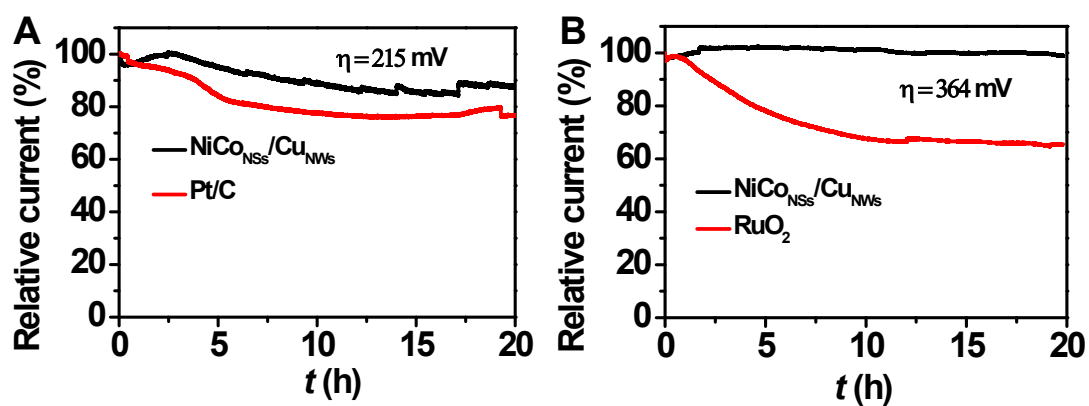

**Figure S6.** Comparison of electrocatalytic durability of  $\text{NiCo}_{\text{NSS}}/\text{Cu}_{\text{NWs}}$  with benchmark Pt/C and  $\text{RuO}_2$  in 1 M KOH (A) HER electrocatalytic durability of  $\text{NiCo}_{\text{NSS}}/\text{Cu}_{\text{NWs}}$  and Pt/C, (B) OER electrocatalytic durability of  $\text{NiCo}_{\text{NSS}}/\text{Cu}_{\text{NWs}}$  and  $\text{RuO}_2$

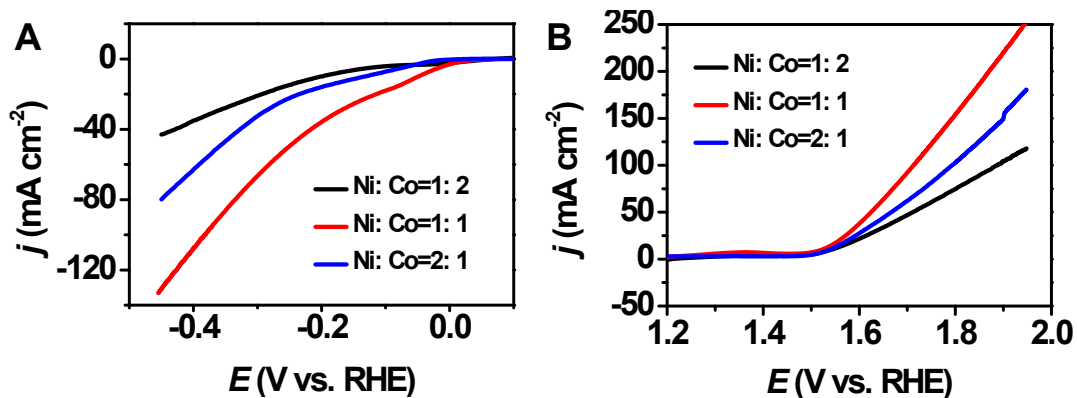

**Figure S7.** LSV curves for HER (A) and OER (B) at NiCo<sub>NSs</sub>/Cu<sub>NWs</sub> prepared with different concentration ratio of NiCl<sub>2</sub> and CoCl<sub>2</sub>.

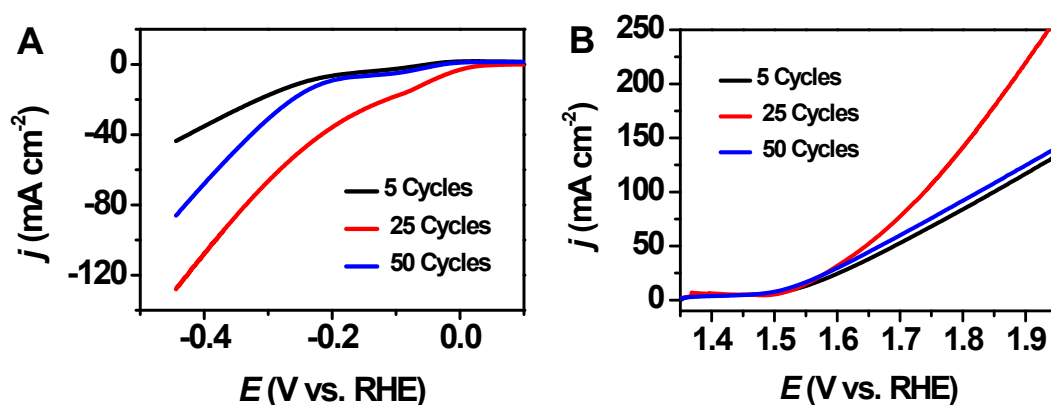

**Figure S8.** LSV curves for HER (A) and OER (B) at NiCo<sub>NSs</sub>/Cu<sub>NWs</sub> prepared by different cycles of electrodeposition.

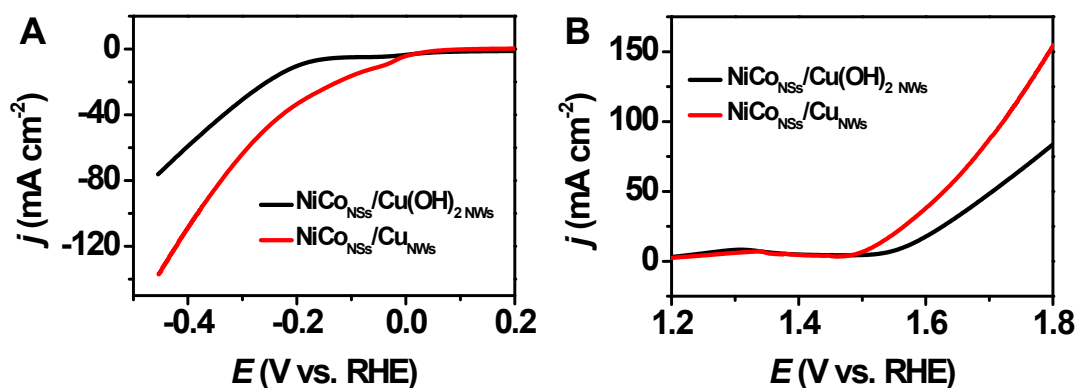

**Figure S9.** LSV curves for HER (A) and OER (B) at NiCo<sub>NSs</sub>/Cu(OH)<sub>2</sub> NWs and NiCo<sub>NSs</sub>/Cu<sub>NWs</sub>.



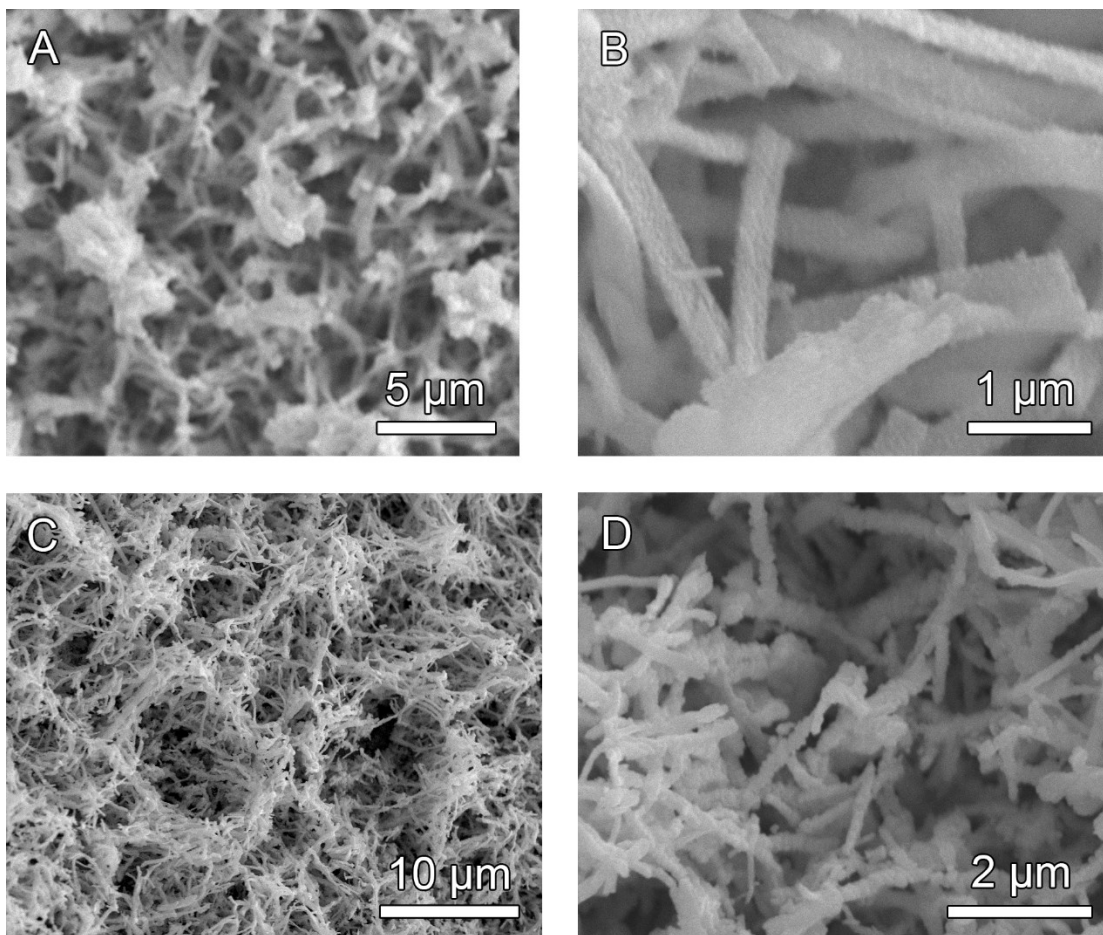

**Figure S10.** SEM images of NiCo<sub>NSs</sub>/Cu<sub>NWs</sub> after overall water splitting an applied voltage of 1.78 V for 20 hours: (A, B) HER side, (C, D) OER side.

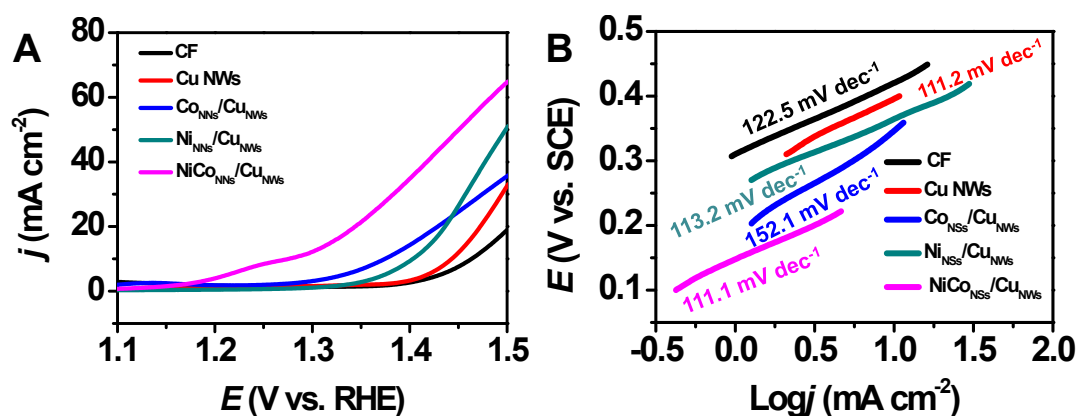

**Figure S11.** (A) LSV curves at a scan rate of 2 mV s<sup>-1</sup> and (B) Tafel plots of NiCo<sub>NSs</sub>/Cu<sub>NWs</sub> and other contrast samples in 1.0 M KOH with 10 mM added HMF.

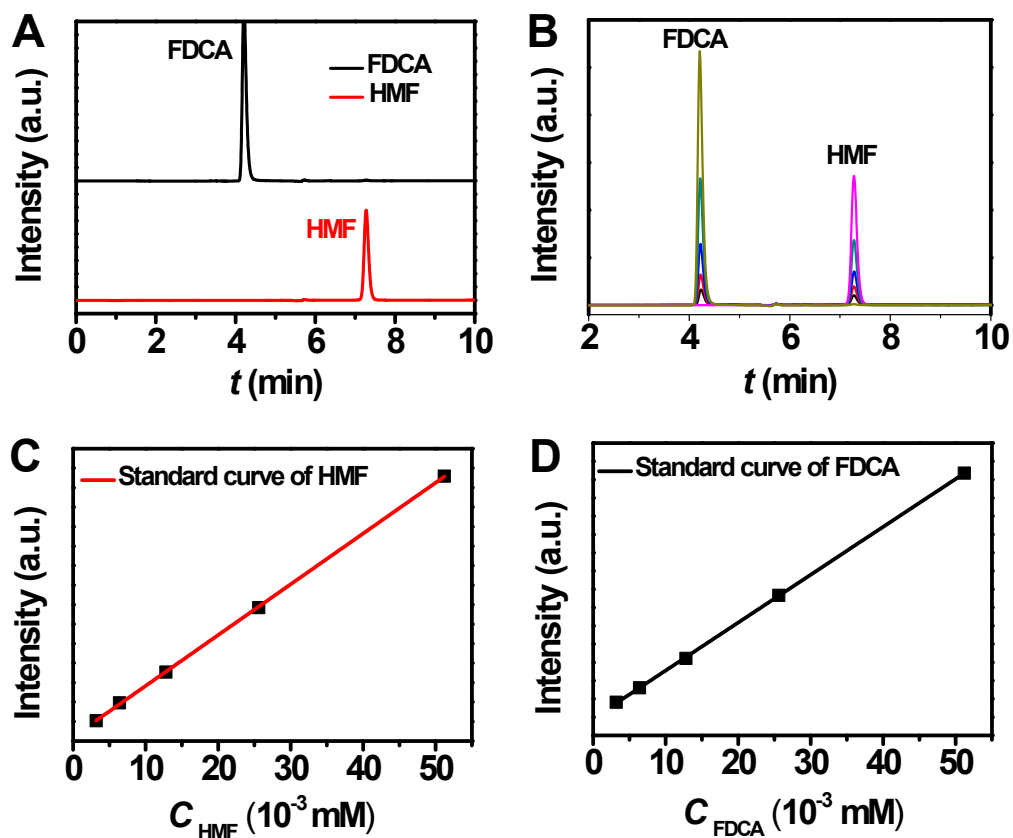

**Figure S12.** (A) HPLC measurements of pure HMF and FDCA. (B) HPLC chromatograms and calibration of the HPLC for (C) HMF and (D) FDCA.

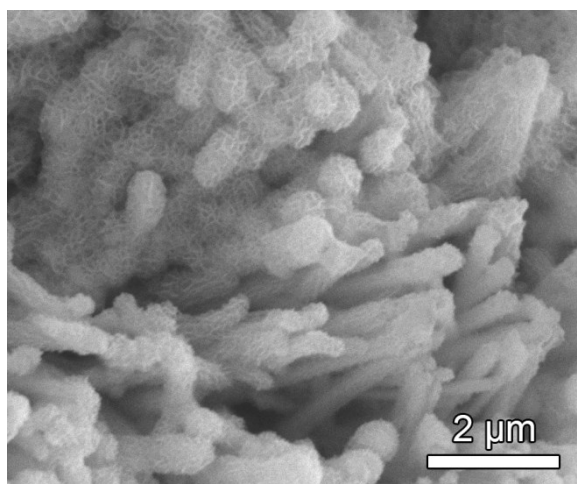

**Figure S13.** SEM image of NiCoNSs/CuNWs after 6 h electrolysis at 1.44 V vs. RHE in 1.0 M KOH with 10 mM added HMF.

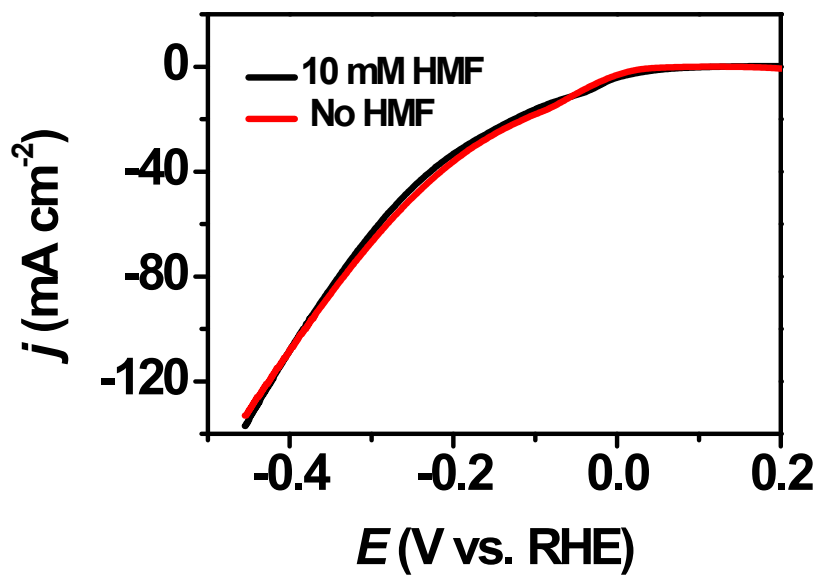

**Figure S14.** LSV curves for HER at NiCo<sub>N<sub>S</sub>s</sub>/Cu<sub>N<sub>W</sub>s</sub> at a scan rate of 2 mV s<sup>-1</sup> in 1.0 M KOH with and without 10 mM HMF.

**Table S1.** Contents of Ni and Co of NiCo<sub>NSS</sub>/Cu<sub>NWS</sub> by ICP-AES analysis and the correlation between the Ni/Co content and HER/OER catalytic performance.

| concentration ratio of Ni <sup>2+</sup> and Co <sup>2+</sup> | Element | mass loading (mg/cm <sup>2</sup> ) | HER ( $\eta$ @10 mA cm <sup>-2</sup> ) (mV) | OER ( $\eta$ @10 mA cm <sup>-2</sup> ) (mV) |
|--------------------------------------------------------------|---------|------------------------------------|---------------------------------------------|---------------------------------------------|
| 1:2                                                          | Ni      | 0.38                               | 201                                         | 320                                         |
|                                                              | Co      | 0.605                              |                                             |                                             |
| 1:1                                                          | Ni      | 0.415                              | 49                                          | 303                                         |
|                                                              | Co      | 0.425                              |                                             |                                             |
| 2:1                                                          | Ni      | 0.64                               | 132                                         | 308                                         |
|                                                              | Co      | 0.312                              |                                             |                                             |

**Table S2.** Comparison of the HER performance for the NiCo<sub>NSS</sub>/Cu<sub>NWS</sub> catalyst with other reported electrocatalysts in 1 M KOH electrolyte.

| Catalysts                                                                        | Supports        | $\eta$ (10 mA cm <sup>-2</sup> ) | References                                                    |
|----------------------------------------------------------------------------------|-----------------|----------------------------------|---------------------------------------------------------------|
| CoNi@NC                                                                          | Glassy carbon   | 142                              | <i>Angew. Chem. Int. Ed.</i> <b>2015</b> , <i>54</i> , 2100   |
| CoNi-OOH-30(40)                                                                  | Titanium sheets | 210                              | <i>Electrochim. Acta</i> <b>2019</b> , <i>301</i> , 449       |
| CoNiBDC/CC                                                                       | Carbon Cloth    | 135                              | <i>New J. Chem.</i> <b>2020</b> , <i>44</i> , 1694            |
| Co <sub>81</sub> Ni <sub>19</sub> nanosheet arrays                               | Cu foam         | 132                              | <i>J. Power Sources</i> <b>2019</b> , <i>427</i> , 184        |
| CoNi@NC-NCNTs                                                                    | Carbon cloth    | 85                               | <i>Appl. Surf. Sci.</i> <b>2020</b> , <i>517</i> , 145841     |
| NiCo <sub>2</sub> O <sub>4</sub> /NiCoP                                          | RDE             | 198                              | <i>Catal. Sci. Technol.</i> <b>2020</b> , <i>10</i> , 5559    |
| MoS <sub>2</sub> /Co <sub>9</sub> S <sub>8</sub> /Ni <sub>3</sub> S <sub>2</sub> | Nickel foam     | 113                              | <i>J. Am. Chem. Soc.</i> <b>2019</b> , <i>141</i> , 10417     |
| NiCo-nitrides/NiCo <sub>2</sub> O <sub>4</sub>                                   | Graphite fibers | 71                               | <i>Adv. Sci.</i> <b>2019</b> , <i>6</i> , 1801829             |
| CoP@BCN                                                                          | Glassy carbon   | 215                              | <i>Adv. Energy Mater.</i> <b>2017</b> , <i>7</i> , 1601671    |
| MoS <sub>2</sub> /Ni <sub>3</sub> S <sub>2</sub>                                 | Nickel foam     | 110                              | <i>Angew. Chem. Int. Ed.</i> <b>2016</b> , <i>55</i> , 6702   |
| Co(OH) <sub>2</sub> @P-NiCo-LDH                                                  | Carbon paper    | 226                              | <i>J. Colloid Interf. Sci.</i> <b>2021</b> , <i>582</i> , 535 |
| NiCo <sub>2</sub> S <sub>4</sub>                                                 | Glassy carbon   | 345                              | <i>RSC Adv.</i> <b>2020</b> , <i>10</i> , 22196               |
| NiCoP@Cu <sub>3</sub> P                                                          | Cu foam         | 54                               | <i>J. Mater. Chem. A.</i> <b>2018</b> , <i>6</i> , 2100       |
| Cu <sub>0.50</sub> Fe <sub>0.50</sub>                                            | NF              | 158                              | <i>Small</i> <b>2020</b> , <i>16</i> , 1905884                |
| Cu <sub>3</sub> P@NPC                                                            | copper foam     | 135.45                           | <i>Sustainable Energy Fuels</i> <b>2021</b> , <i>5</i> , 2451 |
| Cu <sub>3</sub> N                                                                | NF              | 118                              | <i>ACS Energy Lett.</i> <b>2019</b> , <i>4</i> , 747          |
| Co <sub>2</sub> P@NPPC                                                           | glass carbon    | 240                              | <i>Sustainable Energy Fuels</i> <b>2021</b> , <i>5</i> , 2477 |
| NiCo <sub>NSS</sub> /Cu <sub>NWS</sub>                                           | Cu foam         | 50                               | <b>This work</b>                                              |

**Table S3.** Comparison of the OER performance for the NiCo<sub>NSS</sub>/Cu<sub>NWS</sub> catalyst with other reported electrocatalysts in 1 M KOH electrolyte.

| Catalysts                                        | Supports        | $\eta$<br>(10 mAcm <sup>-2</sup> ) | References                                               |
|--------------------------------------------------|-----------------|------------------------------------|----------------------------------------------------------|
| Ni-Co nanowire                                   | Carbon fiber    | 302                                | <i>Adv. Energy Mater.</i> <b>2017</b> , 7, 1601492       |
| CoNi(OH) <sub>x</sub>                            | Cu foil         | 280                                | <i>Adv. Energy Mater.</i> <b>2016</b> , 6, 1501661       |
| Exfoliate NiFe LDH                               | Glassy carbon   | 302                                | <i>Nat. Commun.</i> <b>2014</b> , 5, 5477                |
| NiCoP/C nanobox                                  | Glassy carbon   | 330                                | <i>Angew. Chem. Int. Ed.</i> <b>2017</b> , 56, 3897      |
| Mo-CoOOH                                         | Glassy carbon   | 305                                | <i>Nano Energy</i> <b>2018</b> , 48, 73                  |
| CoNi-OOH-30(40)                                  | Titanium sheets | 279                                | <i>Electrochim. Acta</i> <b>2019</b> , 301, 449          |
| Co-Mo <sub>2</sub> C NPs                         | Glassy carbon   | 347                                | <i>Appl. Catal. B-Environ.</i> <b>2018</b> , 227, 340    |
| Co/NiMOFs@Fe                                     | Fe foam         | 264                                | <i>Chemcatchem</i> <b>2019</b> , 18, 6061                |
| Ni-MOF                                           | Carbon          | 346                                | <i>Chemelectrochem</i> <b>2018</b> , 5, 2795             |
| Co-Fe/Ni@HPA-MOF                                 | Glassy carbon   | 320                                | <i>J. Solid State Chem.</i> <b>2019</b> , 272, 32        |
| Mo-CoOOH                                         | Glassy carbon   | 305                                | <i>Nano Energy</i> <b>2018</b> , 48, 73                  |
| NiCoP@Cu <sub>3</sub> P                          | Cu foam         | 309                                | <i>J. Mater. Chem. A</i> <b>2018</b> , 6, 2100           |
| Co <sub>3</sub> S <sub>4</sub> @MoS <sub>2</sub> | Glassy carbon   | 280                                | <i>Nano Energy</i> <b>2018</b> , 47, 494                 |
| CoMnP                                            | Glassy carbon   | 330                                | <i>J. Am. Chem. Soc.</i> <b>2016</b> , 138, 4006         |
| CoNi(OH) <sub>x</sub> nanotubes                  | Cu foil         | 280                                | <i>Adv. Energy Mater.</i> <b>2016</b> , 6, 1501661       |
| NiCo <sub>2</sub> O <sub>4</sub> /NiCoP          | RDE             | 295                                | <i>Catal. Sci. Technol.</i> <b>2020</b> , 10, 5559       |
| NiCo LDH nanostructures                          | Carbon paper    | 367                                | <i>Nano Lett.</i> <b>2015</b> , 15, 1421                 |
| S-CoMn <sub>2</sub> O <sub>4</sub> -MSs          | FTO             | 300                                | <i>J. Mater. Chem. A</i> <b>2021</b> , 9, 12255          |
| Mn <sub>x</sub> Co <sub>3-x</sub> O <sub>4</sub> | Ni foam         | 327                                | <i>Int. J. Hydrogen Energy</i> <b>2020</b> , 45, 14867   |
| Mixed Ni-Co-Mn oxide                             | Glassy carbon   | 400                                | <i>ACS Appl. Energy Mater.</i><br>10.1021/acsaem.0c00544 |
| Defect-rich Cobalt oxide                         | Glassy carbon   | 369                                | <i>ChemSusChem</i> <b>2020</b> , 13, 520                 |
| Co@NCNT                                          | GCE             | 310                                | <i>Sustainable Energy Fuels</i> <b>2021</b> , 5, 820     |
| Co <sub>2</sub> P@NPPC                           | Glassy carbon   | 316                                | <i>Sustainable Energy Fuels</i> <b>2021</b> , 5, 2477    |
| Co/P/N-CNP                                       | NF              | 311                                | <i>Electrochim. Acta</i> <b>2020</b> , 337, 135807       |
| NiCo <sub>NSS</sub> /Cu <sub>NWS</sub>           | Cu foam         | 303                                | <b>This work</b>                                         |

**Table S4.** Comparison of the bifunctional water splitting activity of NiCo<sub>NSS</sub>/Cu<sub>NWS</sub> catalyst with other reported electrocatalysts in 1 M KOH electrolyte.

| Catalysts                                                                                    | Overall voltages<br>(10 mAcm <sup>-2</sup> ) | References                                               |
|----------------------------------------------------------------------------------------------|----------------------------------------------|----------------------------------------------------------|
| NiFe/NiCo <sub>2</sub> O <sub>4</sub> /NF                                                    | 1.67                                         | <i>Adv. Funct. Mater.</i> <b>2016</b> , 26, 3515         |
| NiFe LDH/NF                                                                                  | 1.70                                         | <i>Science</i> <b>2014</b> , 345, 1593                   |
| CoP/rGO                                                                                      | 1.7                                          | <i>Chem. Sci.</i> <b>2016</b> , 7, 1690                  |
| Ni <sub>x</sub> Co <sub>3-x</sub> O <sub>4</sub>    NiCo/NiCoOx                              | 1.75                                         | <i>ACS Appl. Mater. Interfaces</i> <b>2016</b> , 8, 4718 |
| NiCo <sub>2</sub> O <sub>4</sub>    Ni <sub>0.33</sub> Co <sub>0.67</sub> S <sub>2</sub> NWs | 1.73                                         | <i>Adv. Energy Mater.</i> <b>2015</b> , 5, 1402031       |
| NiCo <sub>2</sub> O <sub>4</sub>                                                             | 1.65                                         | <i>Angew. Chem. Int. Ed.</i> <b>2016</b> , 55, 6290      |
| CoO/MoO <sub>x</sub>                                                                         | 1.72                                         | <i>ACS Sustain. Chem. Eng.</i> <b>2016</b> , 4, 3743     |
| Co <sub>1</sub> Mn <sub>1</sub> CH/NF                                                        | 1.68                                         | <i>J. Am. Chem. Soc.</i> <b>2017</b> , 139, 832          |
| Co–Fe oxyphosphide microtubes                                                                | 1.69                                         | <i>Adv. Sci.</i> <b>2019</b> , 6, 1900576                |
| CP/CTs/Co-S                                                                                  | 1.76                                         | <i>ACS nano</i> <b>2016</b> , 10, 2342                   |
| CoNi-OOH-30(40)                                                                              | 1.76                                         | <i>Electrochim. Acta</i> <b>2019</b> , 301, 449          |
| NiCo <sub>NSS</sub> /Cu <sub>NWS</sub>                                                       | 1.69                                         | <b>This work</b>                                         |
